# Supplementary material
Source: PubMed Central journal article supplement (PMC7654738)
Supplement: mic-166-867-s001.pdf [file mic-166-867-s001.pdf]

1 **MifS, a DctB-family histidine kinase, is a specific regulator of  $\alpha$ -ketoglutarate response in**  
2 ***Pseudomonas aeruginosa* PAO1**

3 Authors: Zaara Sarwar, Michael X. Wang, Benjamin R. Lundgren, and Christopher T. Nomura

4  
5 **Supplementary Data**

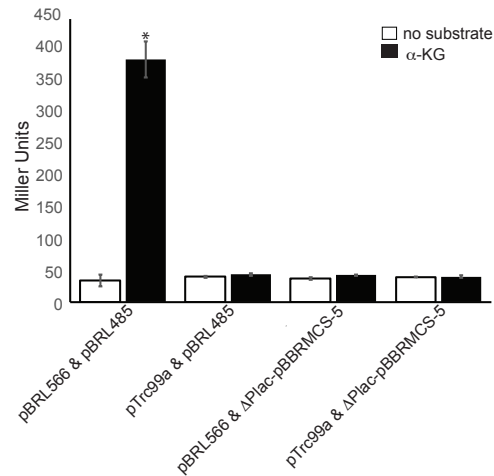

6  
7 **Supplementary Data Figure S1.** *E. coli* TOP10 cells harbouring plasmids pBRL566 for the  
8 expression of wildtype MifS/MifR and pBRL485 containing the  $P_{PA5530}::lacZ$  reporter, the empty  
9 plasmid pTrc99a and plasmid pBRL485, plasmid pBRL566 and the empty plasmid  $\Delta Plac$ -  
10 pBBR1MCS-5, or empty plasmids pTrc99a and  $\Delta Plac$ -pBBR1MCS-5 were grown in LB to an  
11  $OD_{600}$  of  $\sim 0.3$  and then challenged with 20 mM  $\alpha$ -KG or no substrate. Data points represent mean  
12 values  $\pm$  the standard deviations ( $n = 3$ ). Analysis of variance was performed by using Dunnett's  
13 *post hoc* test ( $\alpha$  value of 0.05) to identify significant differences ( $P < 0.0001$ ; marked with an  
14 asterisk).

15

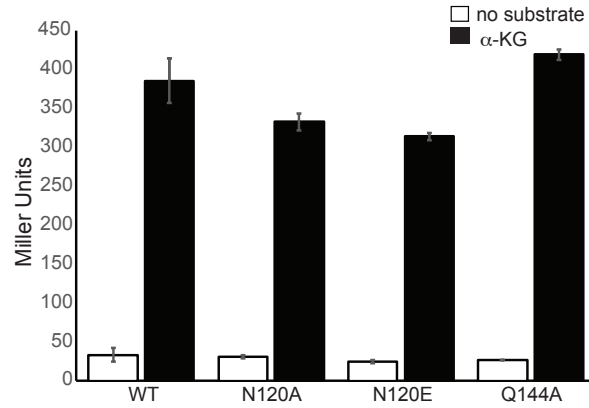

16

17 **Supplementary Data Figure S2.** Wildtype MifS, or a MifS variant with a mutation in a residue

18 adjacent to the predicted binding pocket (MifSN120A, MifSN120E, or MifSQ144A) was

19 expressed in *E. coli* cells harbouring the *mifR* gene and the  $P_{PA5530}::lacZ$  reporter. Cells were

20 grown in LB media to an optical density at 600 nm ( $OD_{600}$ ) value of 0.3. They were then

21 challenged with  $\alpha$ -KG or no substrate allowed to grow for an additional 60 minutes post

22 induction. Data points represent mean values  $\pm$  the standard deviations ( $n = 3$ ). Analysis of

23 variance was performed by using Dunnett's *post hoc* test ( $\alpha$  value of 0.05) to identify significant

24 differences ( $P < 0.0001$ ).

25
